# Supplementary material
Source: PubMed Central journal article supplement (PMC4992409)

## Supplementary Material

**Supplementary Figure 1.** Hits validation. 6-Point concentration-response curves of the 10 FDA approved drugs identified from the primary screen to enhance bEnd3 monolayer integrity. The drugs were tested in the concentration range 0.75-10  $\mu\text{M}$ . Data represent mean $\pm$ SEM, n = 6 for each concentration.

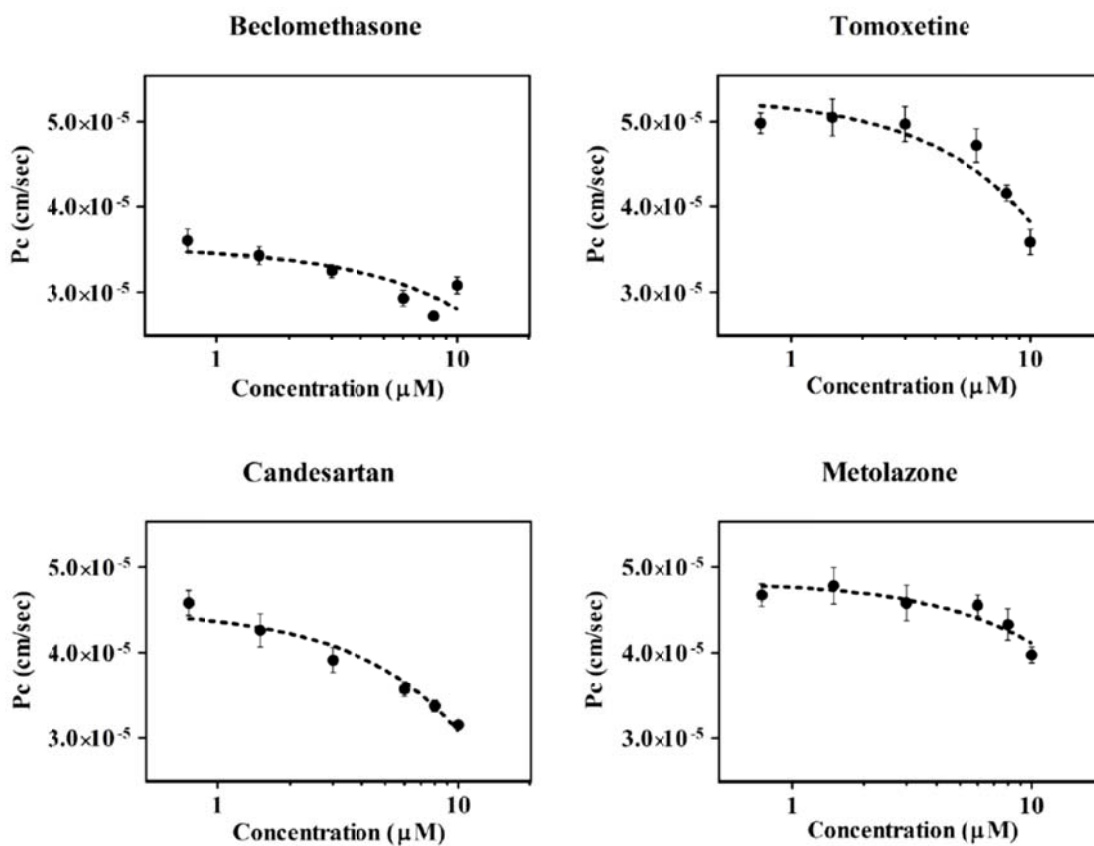

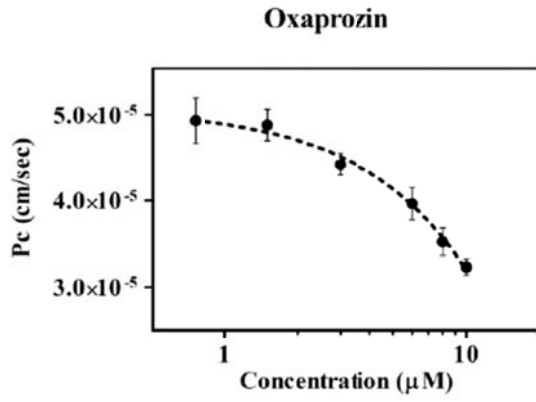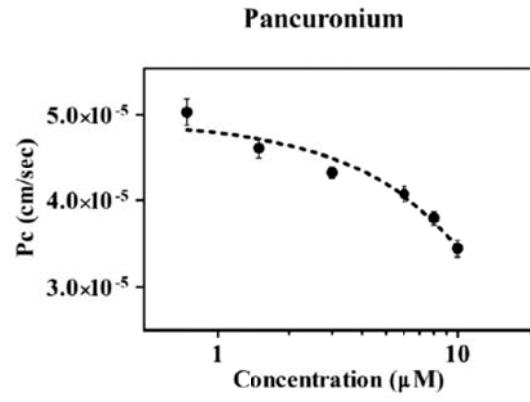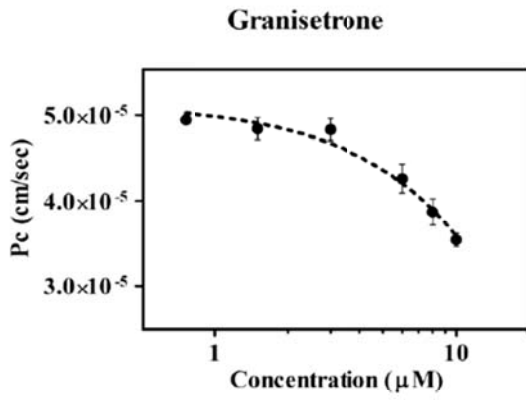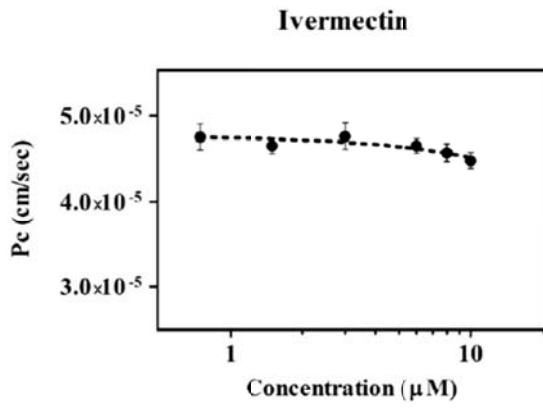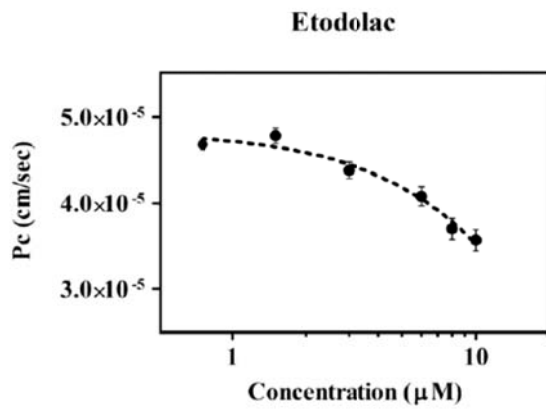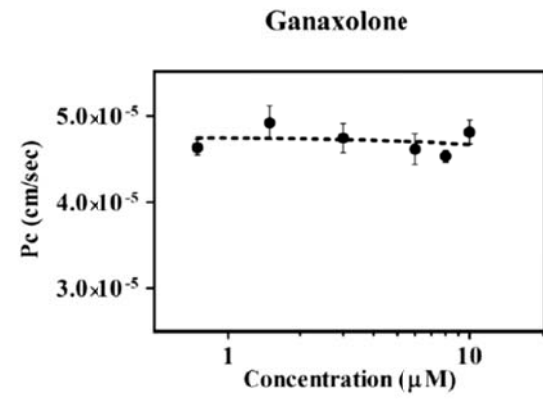

Supplement: NIHMS807591-supplement-supplement_1.pdf [file NIHMS807591-supplement-supplement_1.pdf]
